# Supplementary material for: Sludge-derived novel Fe3O4–MgO@C composites for tetracycline abatement from wastewater using sustainable bio-electro-Fenton and nutrient recovery with co-precipitation: a waste-to-resource strategy
Source: Royal Society of Chemistry journal article supplement (doi:10.1039/d4ew00684d), 2024-01-01
Supplement: d4ew00684d1.pdf [file d4ew00684d1.pdf]

## Supplementary material

### **Sludge-derived novel Fe<sub>3</sub>O<sub>4</sub>-MgO@C composites for tetracycline abatement from wastewater using sustainable bio-electro-Fenton and nutrients recovery with co-precipitation: A waste-to-resource strategy**

Azhan Ahmad<sup>a</sup>, Monali Priyadarshini<sup>b</sup>, Shraddha Yadav<sup>b</sup>, Makarand M. Ghangrekar<sup>a, b, c\*</sup> and Rao Y. Surampalli<sup>d</sup>

<sup>a</sup> Department of Civil Engineering, Indian Institute of Technology Kharagpur, Kharagpur-721302, India.

<sup>b</sup> School of Environmental Science and Engineering, Indian Institute of Technology Kharagpur, Kharagpur-721302, India.

<sup>c</sup> National Institute of Technology Puducherry, Karaikal, 609609, India

<sup>d</sup> Global Institute for Energy, Environment and Sustainability, Kansas, USA

\* Corresponding author; E-mail address: [gghangrekar@civil.iitkgp.ac.in](mailto:gghangrekar@civil.iitkgp.ac.in)

## List of captions

**Text S1.** Characterization of catalyst

**Text S2.** Economic analysis

**Text S3.** Synthetic urine

**Fig. S1.** Elemental composition of sludge waste-derived catalysts according to EDX analysis

**Fig. S2.** (a) Fe 2p; (b) Mg 1s; (c) C 1s; and (d) O 1s spectra of Fe<sub>3</sub>O<sub>4</sub>-MgO@C during XPS analysis

**Fig. S3.** MALDI-TOF spectra of (b) initial TC sample; (c) treated effluent

**Fig. S4.** Degradation of TC antibiotic in homogeneous BEF process

**Fig. S5.** Power density and Voltage in (a) Fe<sub>3</sub>O<sub>4</sub>-MgO@C; and (b) Control BEF system

**Fig. S6.** Influence of current (a) TC removal; (b) H<sub>2</sub>O<sub>2</sub> production; and (c) TOC removal and mineralization current efficiency in EF system

**Fig. S7.** AOS and COS of raw and BEF-treated wastewater representing biodegradability

**Fig. S8.** Removal of (a) TC and PO<sub>4</sub><sup>3-</sup> from synthetic urine during the BEF process; (b) removal of PO<sub>4</sub><sup>3-</sup> and NH<sub>4</sub><sup>+</sup> during precipitation; and (c) struvite yield from urine with the addition of Fe<sub>3</sub>O<sub>4</sub>-MgO@C

**Fig. S9.** Schematic of BEF and co-precipitation revealing contaminant removal in each process

**Table S1.** Characteristics of raw municipal wastewater

### **Text S1. Characterization of catalyst**

Electrochemical analyses, including electrochemical impedance spectroscopy (EIS), linear sweep voltammetry (LSV), cyclic voltammetry (CV), and Tafel analyses, were conducted using an electrochemical workstation (Metrohm, Switzerland). The workstation was comprised of a three-electrode system with glassy carbon, platinum, and Ag/AgCl serving as working, counter, and reference electrodes, respectively. All electrochemical measurements were carried out in a 50 mM Na<sub>2</sub>SO<sub>4</sub> solution at a scan rate of 0.01 mV/s. Morphological analysis of the catalyst was performed using scanning electron microscopy (SEM) equipment (Carl Zeiss, USA). Fourier-transform infrared spectroscopy (FTIR) was conducted within the wavenumber range of 400 to 4000 cm<sup>-1</sup> using Thermo Fisher Scientific Instruments, USA equipment. X-ray diffraction (XRD) was utilized to investigate the structural characteristics and composition of the waste-derived catalyst and sludge. The XRD analysis involved scanning 2θ from 10 to 80° at a scanning rate of 2° min<sup>-1</sup> and a step size of 0.02 using a Bruker D2 Phaser instrument from Germany.

The surface area of the composite catalyst was measured using a multipoint Brunauer–Emmett–Teller (BET) analyser from BEL, Japan, Inc. X-ray photoelectron spectroscopy (XPS) was employed to determine the structural characteristics of the catalyst, utilizing equipment from ULVAC Physical Electronics, USA. Additionally, the magnetic properties of the waste-derived catalyst were analysed using a vibrating sample magnetometer (VSM) from Lake Shore Cryotronics, USA.

### **Text S2. Economic analysis**

The economics of electro-Fenton operation was aimed at assessing the real-scale capability of the process. It is established on the operating cost ( $OC_{\text{total}}$ ) needed to eliminate contaminants by unit order of magnitude per m<sup>3</sup> of contaminated water, which is also recognized as  $OC_{\text{total}}$  per order. The  $OC_{\text{total}}$  includes the catalyst cost, chemical cost, and electricity cost, which were determined by calculating the energy consumption ( $W$ ) and electrical energy per order ( $EEO$ ) as per Eq. (S1) – Eq. (S5)

$$W \left( \frac{kWh}{m^3} \right) = \frac{UIT}{V} \quad (S1)$$

$$EEO \left( \frac{kWh}{m^3 \log} \right) = \frac{W}{\log \left( \frac{C_o}{C} \right)} \quad (S2)$$

$$OC_{total} = \text{Catalyst cost} + \text{Chemical cost} + \text{Electricity cost} \quad (S3)$$

Where,  $U$  is the voltage (V),  $I$  is the imposed current (A),  $T$  is the treatment duration (h),  $V$  is the volume ( $m^3$ ), and  $C_o$  and  $C$  are the initial and final concentrations of contaminants (mg/L), respectively.

$$\text{Chemical cost } (\$/m^3) = \text{Electrolyte utilized } (kg/m^3) \times \text{cost of electrolyte } (\$/kg) \quad (S4)$$

$$\text{Electricity cost } (\$/m^3) = \text{EEO } (kWh/m^3/\log) \times \text{per unit cost of electrical energy } (\$/kWh) \quad (S5)$$

Additionally, the mineralization current efficiency (MCE%) was computed with  $\Delta TOC$  (mg/L) using Eq. (S6)

$$MCE (\%) = \frac{nFV\Delta TOC}{Cmt} \quad (S6)$$

Where,  $n$  is the total number of electrons consumed by SDS for mineralization,  $t$  is the treatment duration (h),  $V$  is the wastewater volume (L),  $F$  indicates the Faraday's constant ( $96485 \text{ C mol}^{-1}$ ),  $c$  represents the conversion factor ( $4.32 \times 10^7$ ), and  $I$  is the external applied current (A).

### Text S3: Synthetic urine

The synthetic urine contained 1.36 g/L  $\text{NaCH}_3\text{COO} \cdot 3\text{H}_2\text{O}$ , 0.74 g/L  $\text{KCl}$ , 0.58 g/L  $\text{NaCl}$ , 0.68 g/L  $\text{KH}_2\text{PO}_4$ , 0.87 g/L  $\text{K}_2\text{HPO}_4$ , 0.28 g/L  $\text{NH}_4\text{Cl}$ , 0.1 g/L  $\text{MgSO}_4 \cdot 7\text{H}_2\text{O}$ , 0.1 g/L  $\text{CaCl}_2 \cdot 2\text{H}_2\text{O}$  and 0.1 mL/L of a trace element mixture.

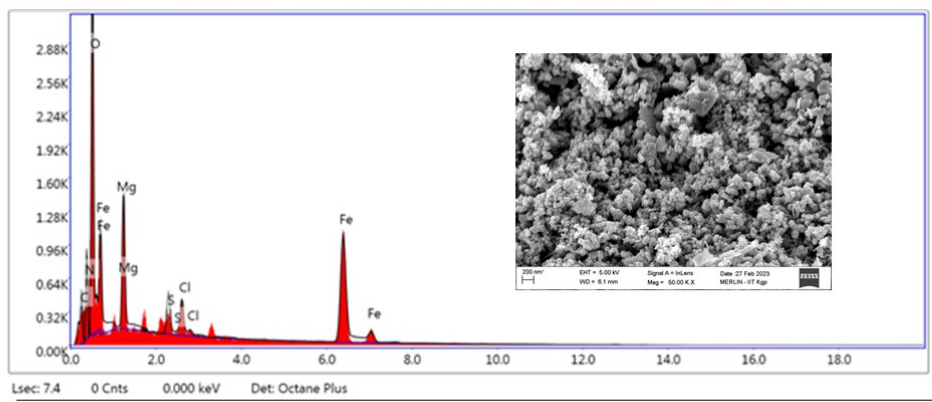

| Element | Weight % | Atomic % | Net Int. | Error % | Kratio |
|---------|----------|----------|----------|---------|--------|
| C K     | 4.07     | 9.68     | 364.36   | 7.67    | 0.0199 |
| N K     | 7.44     | 15.15    | 652.18   | 6.03    | 0.0419 |
| O K     | 18.19    | 32.46    | 3361.72  | 4.33    | 0.1098 |
| MgK     | 7.21     | 8.46     | 1599.65  | 5.36    | 0.0389 |
| S K     | 2.84     | 2.53     | 537.76   | 5.57    | 0.0191 |
| ClK     | 3.17     | 2.55     | 524.20   | 7.69    | 0.0207 |
| FeK     | 57.08    | 29.17    | 2390.25  | 3.76    | 0.3868 |

**Fig. S1.** Elemental composition of sludge waste-derived catalysts according to EDX analysis

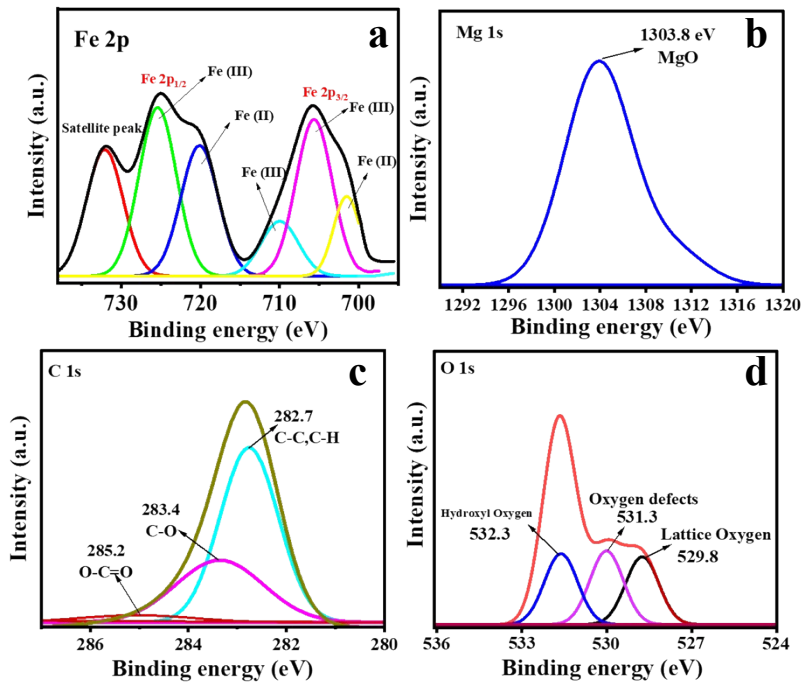

**Fig. S2.** (a) Fe 2p; (b) Mg 1s; (c) C 1s; and (d) O 1s spectra of Fe<sub>3</sub>O<sub>4</sub>-MgO@C during XPS analysis

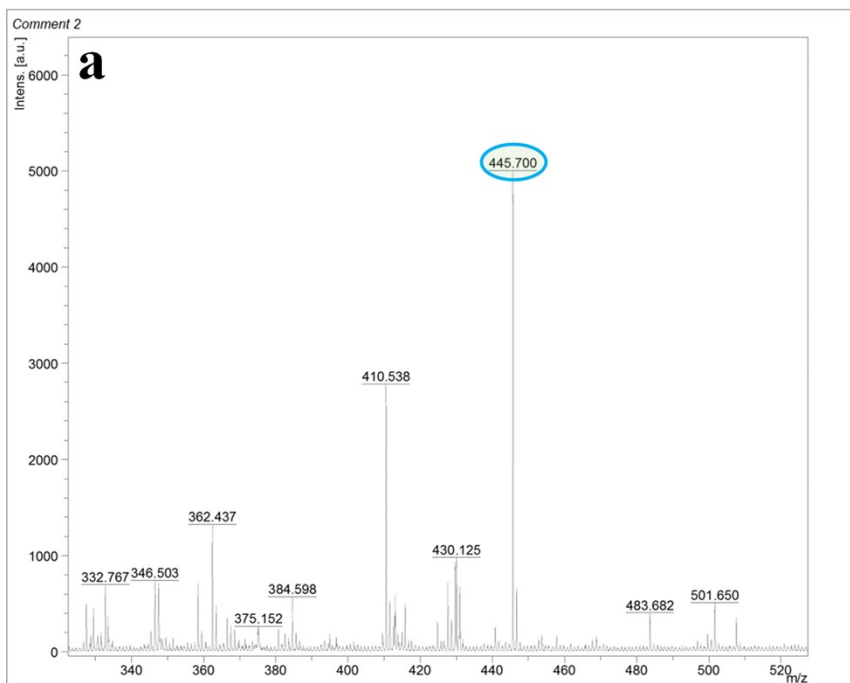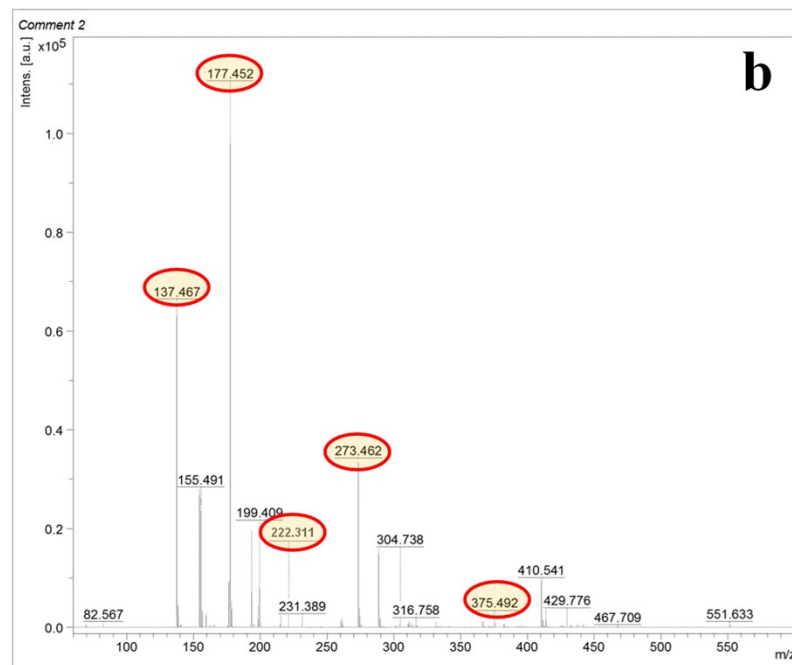

**Fig. S3.** MALDI-TOF spectra of (b) initial TC sample; (c) treated effluent

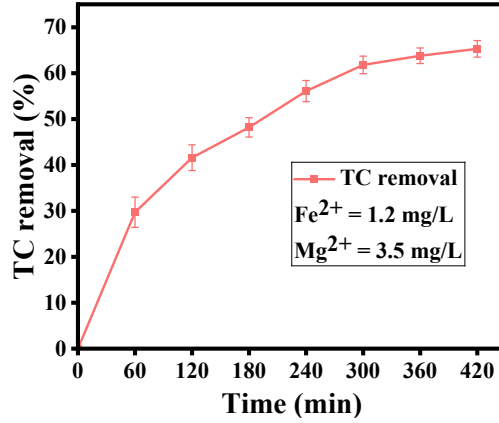

Fig. S4. Degradation of TC antibiotic in homogeneous BEF process (TC = 10 mg/L and pH = 7.0)

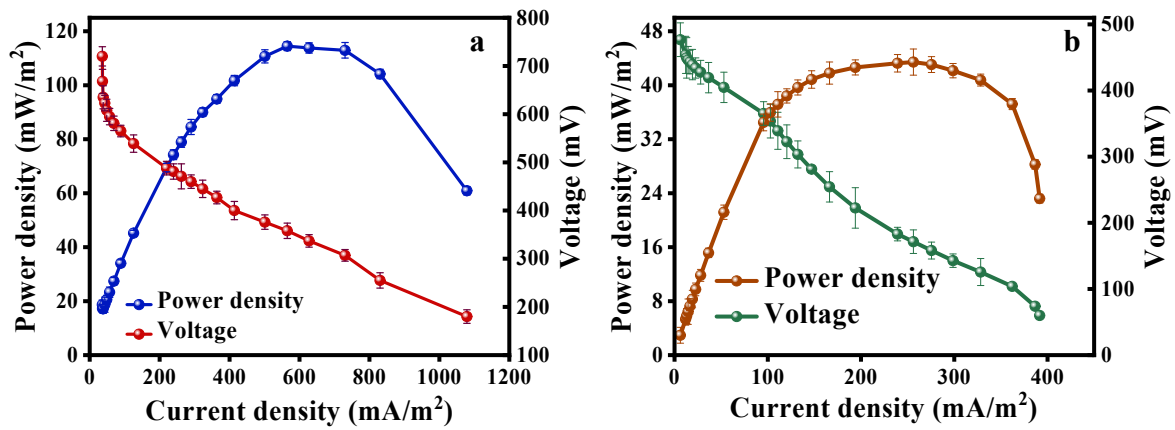

Fig. S5. Power density and voltage in (a) Fe<sub>3</sub>O<sub>4</sub>-MgO@C; and (b) Control BEF system



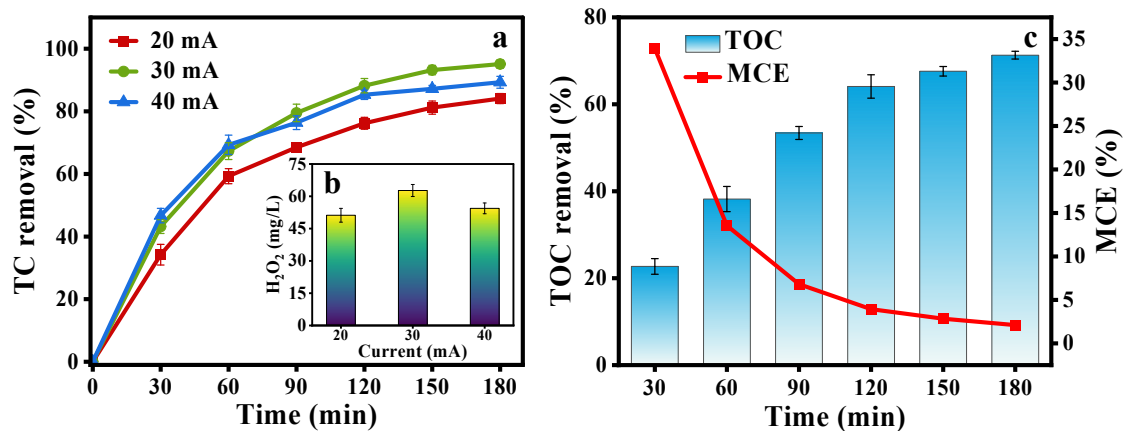

**Fig. S6.** Influence of current (a) TC removal; (b) H<sub>2</sub>O<sub>2</sub> production; and (c) TOC removal and mineralization current efficiency in EF system

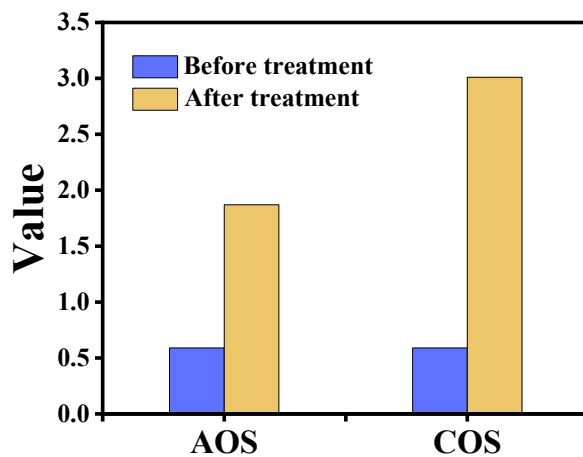

**Fig. S7.** AOS and COS of raw and BEF-treated wastewater representing biodegradability

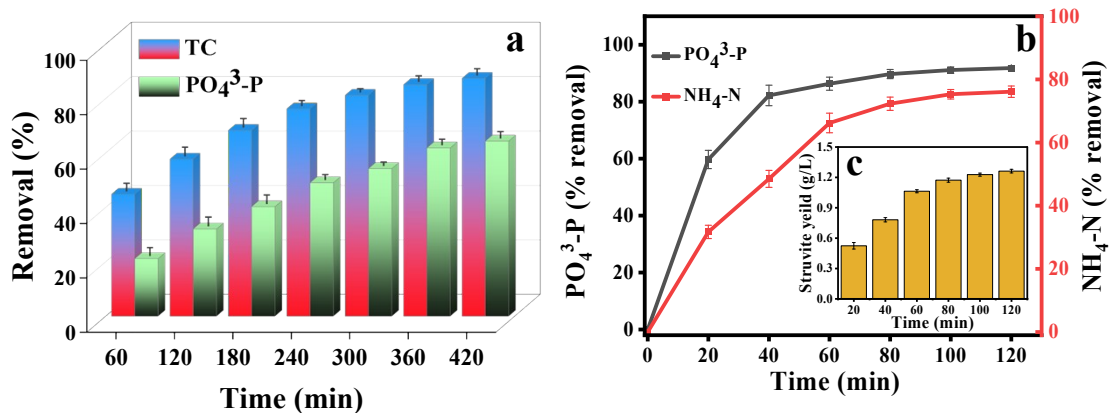

**Fig. S8.** Removal of (a) TC and PO<sub>4</sub><sup>3-</sup> from synthetic urine during the BEF process; (b) removal of PO<sub>4</sub><sup>3-</sup> and NH<sub>4</sub><sup>+</sup> during precipitation; and (c) struvite yield from urine with the addition of Fe<sub>3</sub>O<sub>4</sub>-MgO

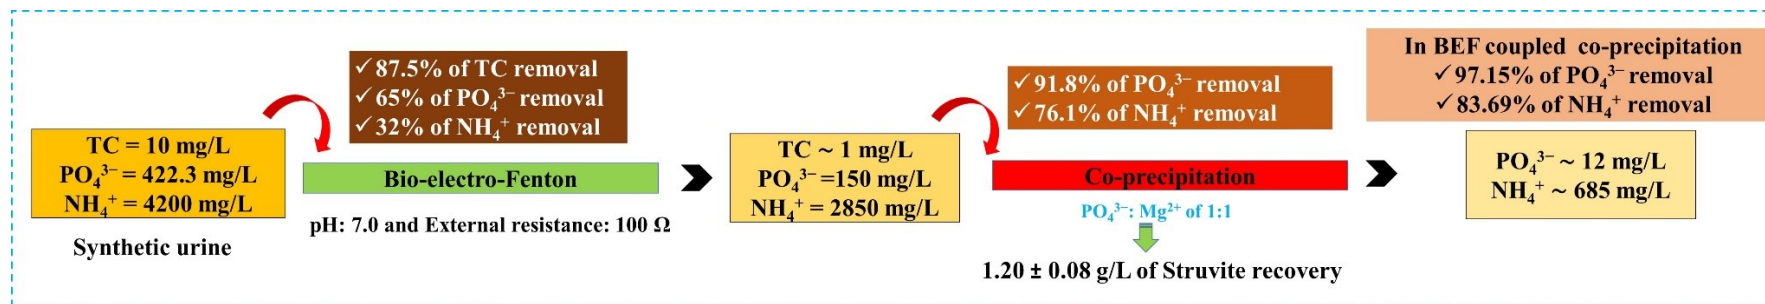

**Fig. S9.** Schematic of BEF and co-precipitation revealing contaminant removal in each process

**Table S1.** Characteristics of raw municipal wastewater

| <b>Parameters</b>                                   | <b>Value</b> |
|-----------------------------------------------------|--------------|
| COD (mg L <sup>-1</sup> )                           | 295 ± 15     |
| pH                                                  | 7.1 ± 0.2    |
| TOC (mg L <sup>-1</sup> )                           | 130 ± 10     |
| Turbidity (NTU)                                     | 97.5 ± 6.0   |
| Cl <sup>-</sup> (mg L <sup>-1</sup> )               | 70 ± 10      |
| Conductivity (μS cm <sup>-1</sup> )                 | 520 ± 20     |
| SO <sub>4</sub> <sup>2-</sup> (mg L <sup>-1</sup> ) | 15.5 ± 3.0   |
| SDS (mg L <sup>-1</sup> )                           | 3.3 ± 0.1    |
